# Supplementary material for: Direct RNA sequencing on nanopore arrays redefines the transcriptional complexity of a viral pathogen
Source: PubMed Central journal article supplement (PMC6376126; doi:10.1038/s41467-019-08734-9), 2019-02-14
Supplement: 41467_2019_8734_MOESM1_ESM.pdf [file 41467_2019_8734_MOESM1_ESM.pdf]

**Direct RNA sequencing on nanopore arrays redefines the  
transcriptional complexity of a viral pathogen**

**Supplementary Information**

**Depledge et al.**

**a**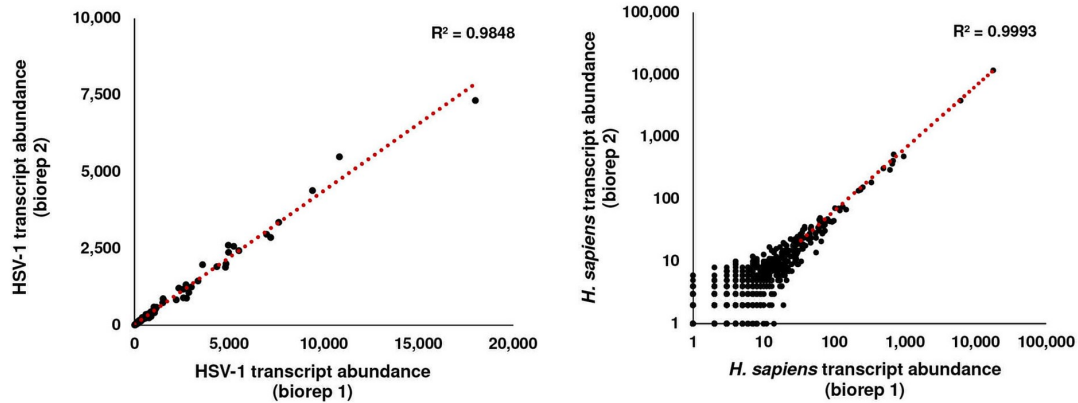**b**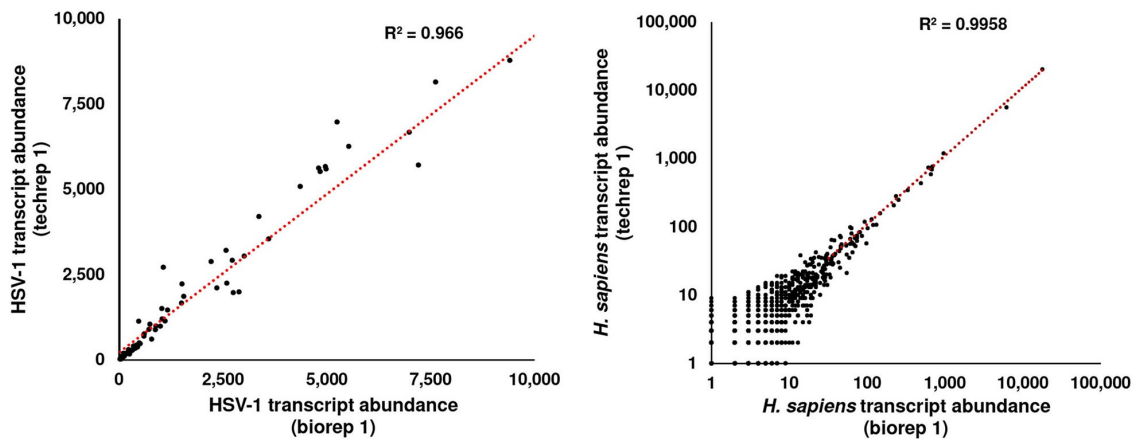**Supplementary Fig. 1: The reproducibility of direct RNA nanopore sequencing.**

**a**, transcript abundances were counted for the HSV-1 (left) and *H. sapiens* (right) transcriptomes and showed near perfect correlation between technical replicates of the NHDF 18hpi (i) and NHDF 18hpi (iii) samples, sequenced on separate MinION devices. **b**, transcript abundances were counted for the HSV-1 (left) and *H. sapiens* (right) transcriptomes and showed near perfect correlation between biological replicates of the NHDF 18hpi (i) and NHDF 18hpi (ii) samples. Here, each circle indicates the mRNA count for a discrete viral or host transcript.

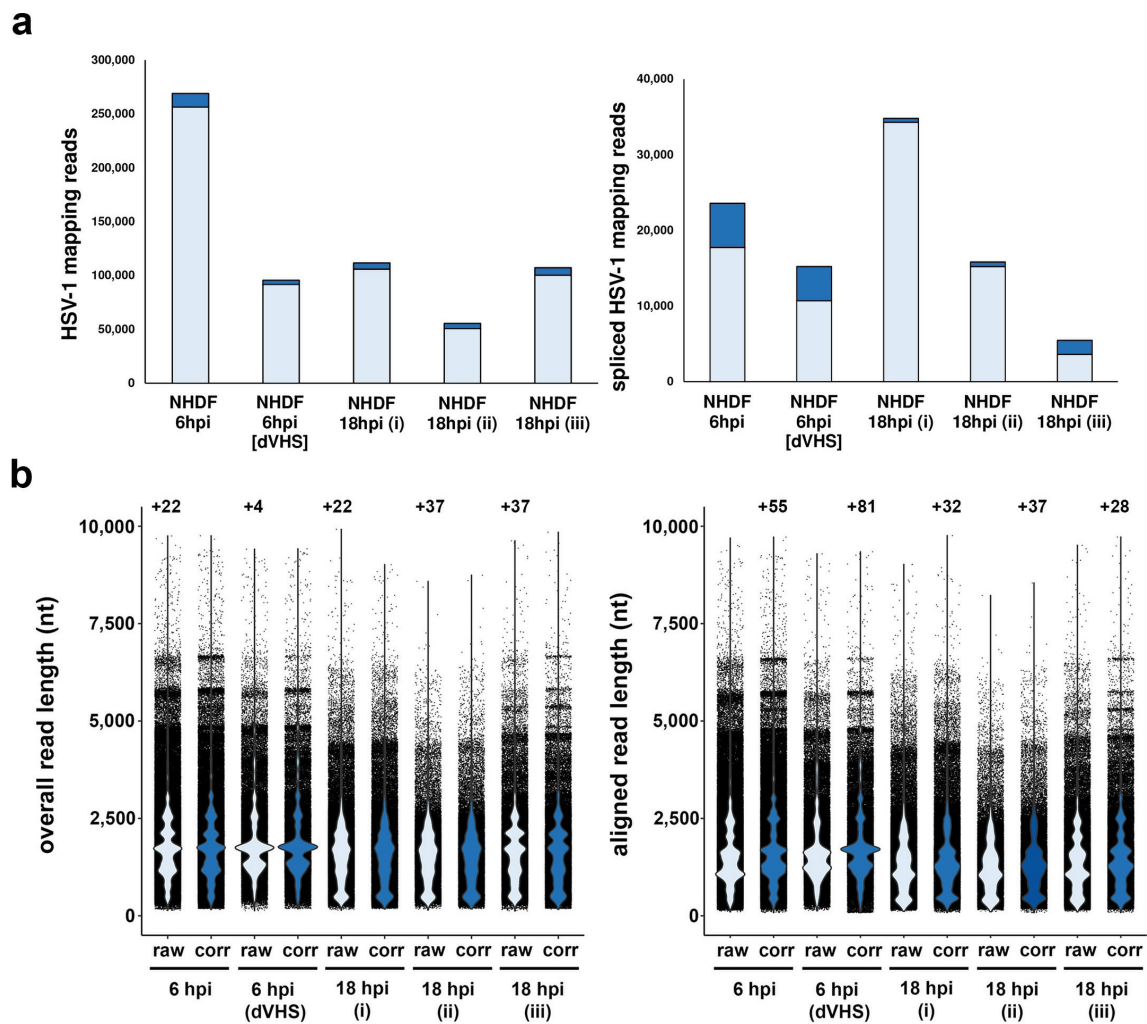

**Supplementary Fig. 2: Error-correction notably improves nanopore sequence read alignment.** **a**, error correction rescued a proportion of unmapped reads and reassigned these as HSV-1 mapping (left) and improved splice site detection in all datasets (right). Light blue bars indicate the HSV-1 mapping reads (left) and spliced HSV-1 reads (right) in the uncorrected dataset. Dark blue bars indicate the numbers of rescued reads following error correction. **b**, violin (dot) plots showing the distribution of overall sequence read lengths (left) and aligned read lengths (right) between raw and error-corrected reads. Overall sequence reads lengths are on average 4 - 37 nt longer in raw versus error-corrected datasets while the aligned read lengths are on average 28 – 81 nt longer in the error-corrected datasets.

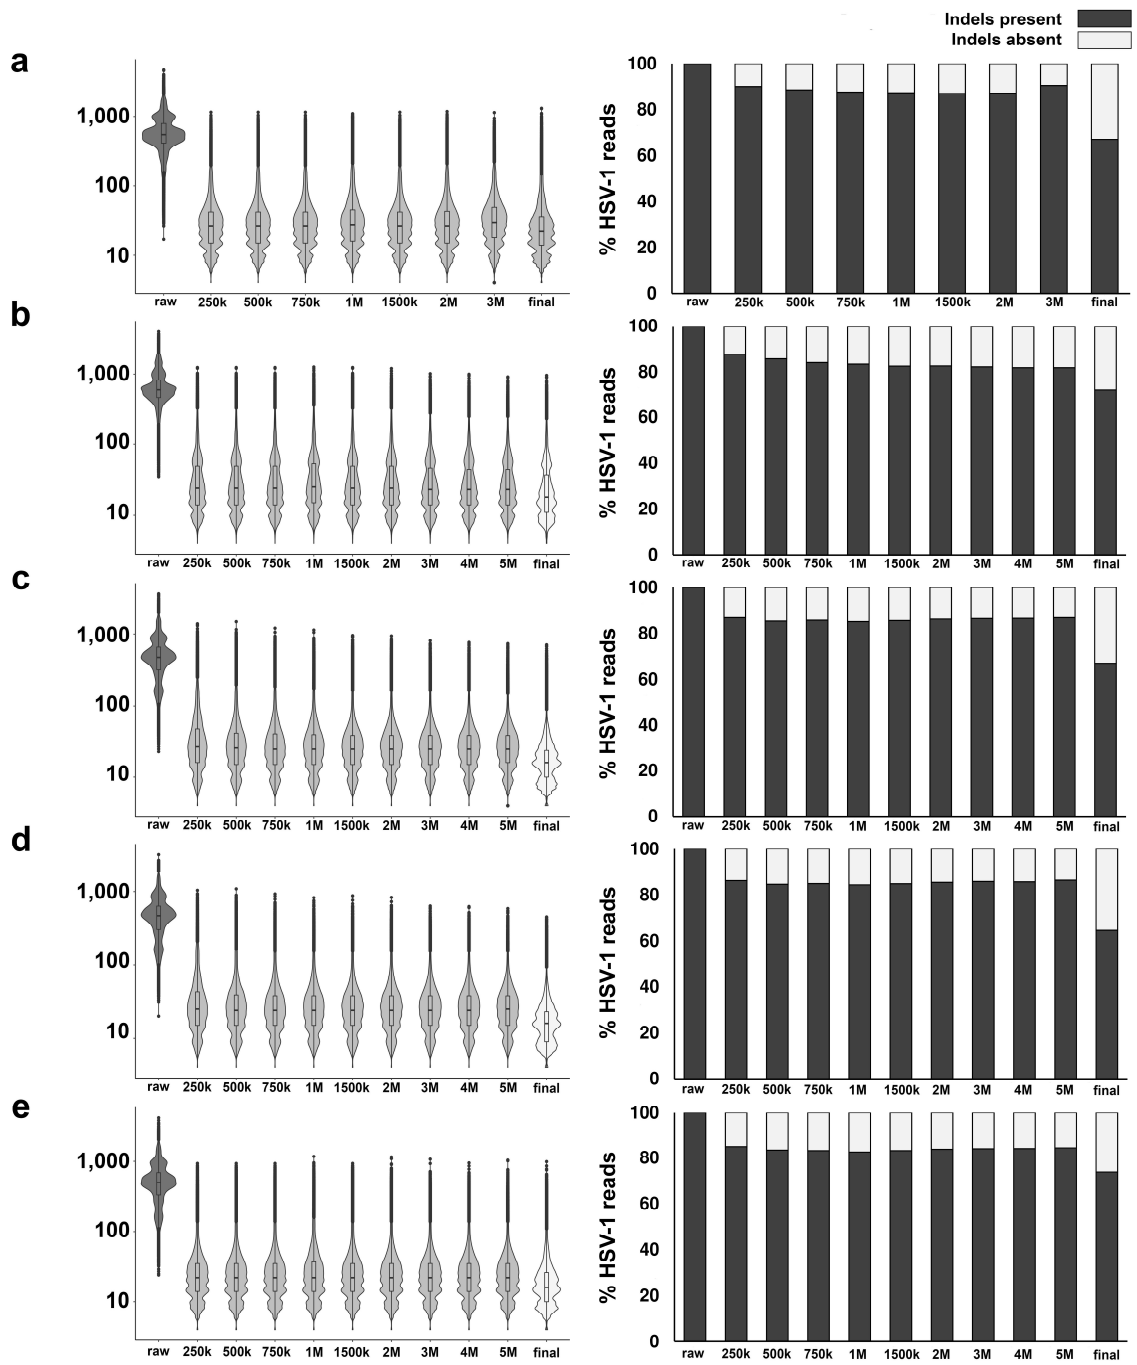

**Supplementary Fig. 3: Proovread error-correction significantly reduces the impact of indel and substitution type errors in nanopore direct RNA reads (HSV-1).** For each of the five datasets generated in this study, sequence reads were mapped against the HSV-1 strain 17 genomes and the CIGAR string length (y-axis) extracted for each individual read. Here, violin plots (left) show the distributions of CIGAR string lengths and the effect of error-correction using proovread and FLASH-merged Illumina sequencing libraries, subsampled for varying numbers of reads (x-axis). Bar plots (right) denote the proportions of HSV-1 mapping reads that contain indels (denoted by the presence of I and/or D in CIGAR strings). Dark shading indicates the proportion of aligned reads containing indels post error-correction while light shading indicates the proportion with no indels following error-correction, The raw dataset comprises uncorrected nanopore reads while the final dataset contains the optimally corrected reads derived from a decision matrix (Fig. 2b), scored by shortest CIGAR string length. **a**, NHDF 6 hpi **b**, NHDF 6 hpi [HSV-1 dVHS mutant] (ii) **c**, NHDF 18hpi (i) biological replicate **d**, NHDF 18hpi (ii) biological replicate and **e**, NHDF 18hpi (iii) technical replicate on separate minION device.

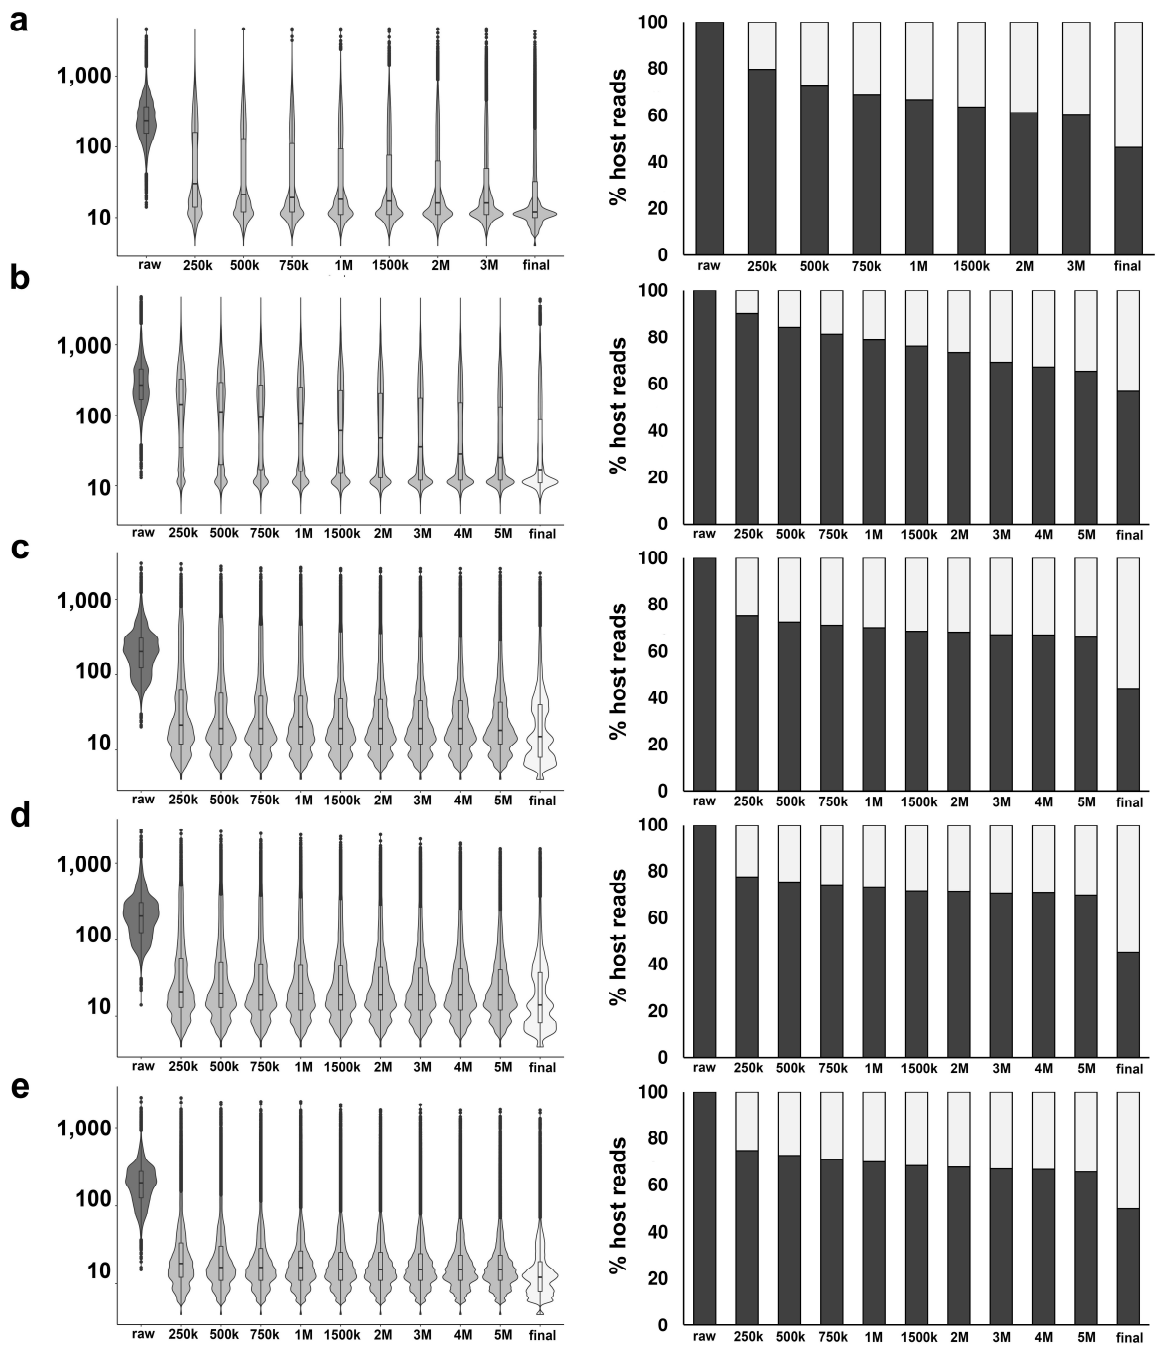

**Supplementary Fig. 4: Proovread error-correction significantly reduces the impact of indel and substitution type errors in nanopore direct RNA reads (host).** For each of the five datasets generated in this study, sequence reads were mapped against the *H. sapiens* transcriptomes and the CIGAR string length (y-axis) extracted for each individual read. Here, violin plots (left) show the distributions of CIGAR string lengths and the effect of error-correction using proovread and FLASH-merged Illumina sequencing libraries, subsampled for varying numbers of reads (x-axis). Bar plots (right) denote the proportions of *H. sapiens* mapping reads that contain indels (denoted by the presence of I and/or D in CIGAR strings). Dark shading indicates the proportion of aligned reads containing indels post error-correction while light shading indicates the proportion with no indels following error-correction. The raw dataset comprises uncorrected nanopore reads while the final dataset contains the optimally corrected reads derived from a decision matrix (Fig. 2b), scored by shortest CIGAR string length. **a**, NHDF 6 hpi **b**, NHDF 6 hpi [HSV-1 dVHS mutant] (ii) **c**, NHDF 18hpi (i) biological replicate **d**, NHDF 18hpi (ii) biological replicate and **e**, NHDF 18hpi (iii) technical replicate on separate minION device.

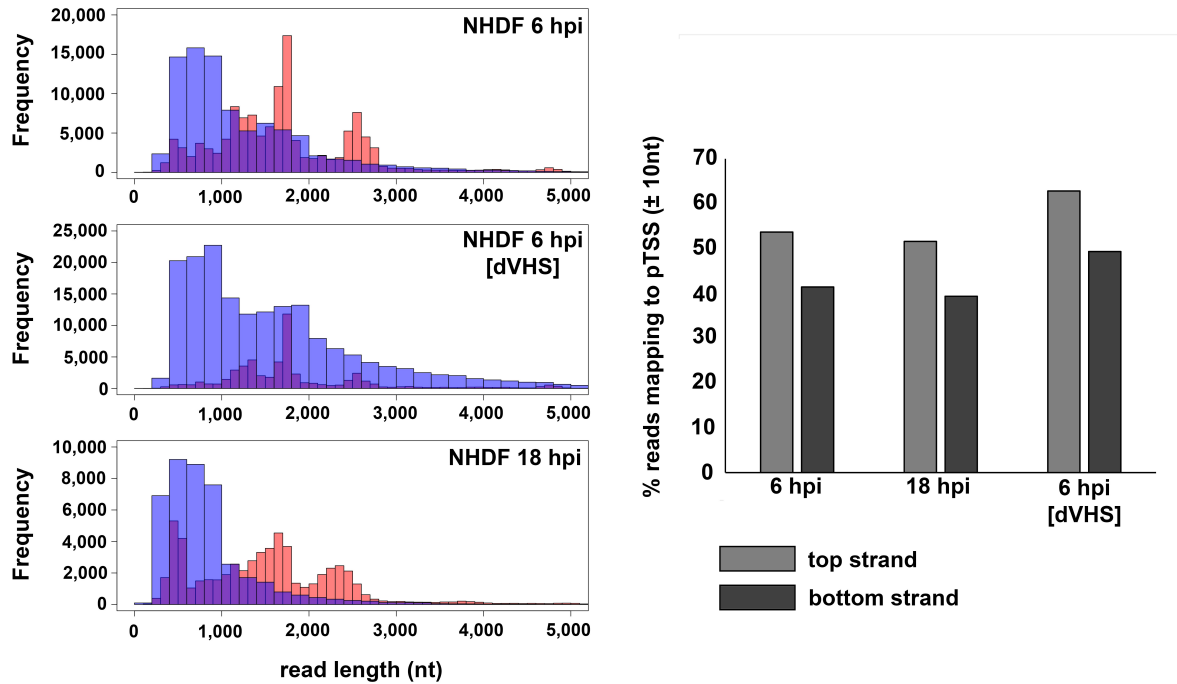

**Supplementary Fig. 5: Host shutoff is impaired by an HSV-1 *vhs* mutant.** **a**, read length distributions from NHDFs infected with wild type HSV-1 collected at 6 hpi (top) or 18 hpi (bottom), or infected with HSV-1  $\Delta vhs$  collected at 6 hpi (middle). Read length distributions of human transcripts (blue) are extended at 6 h compared to 18 h. Viral reads are shown in red or purple. **b**, a greater fraction of reads from the top (shaded bar) or bottom (filled bar) strands of the HSV-1 genome have 5' ends that map close to the pTSS in cells infected with HSV-1  $\Delta vhs$  compared to wild type.



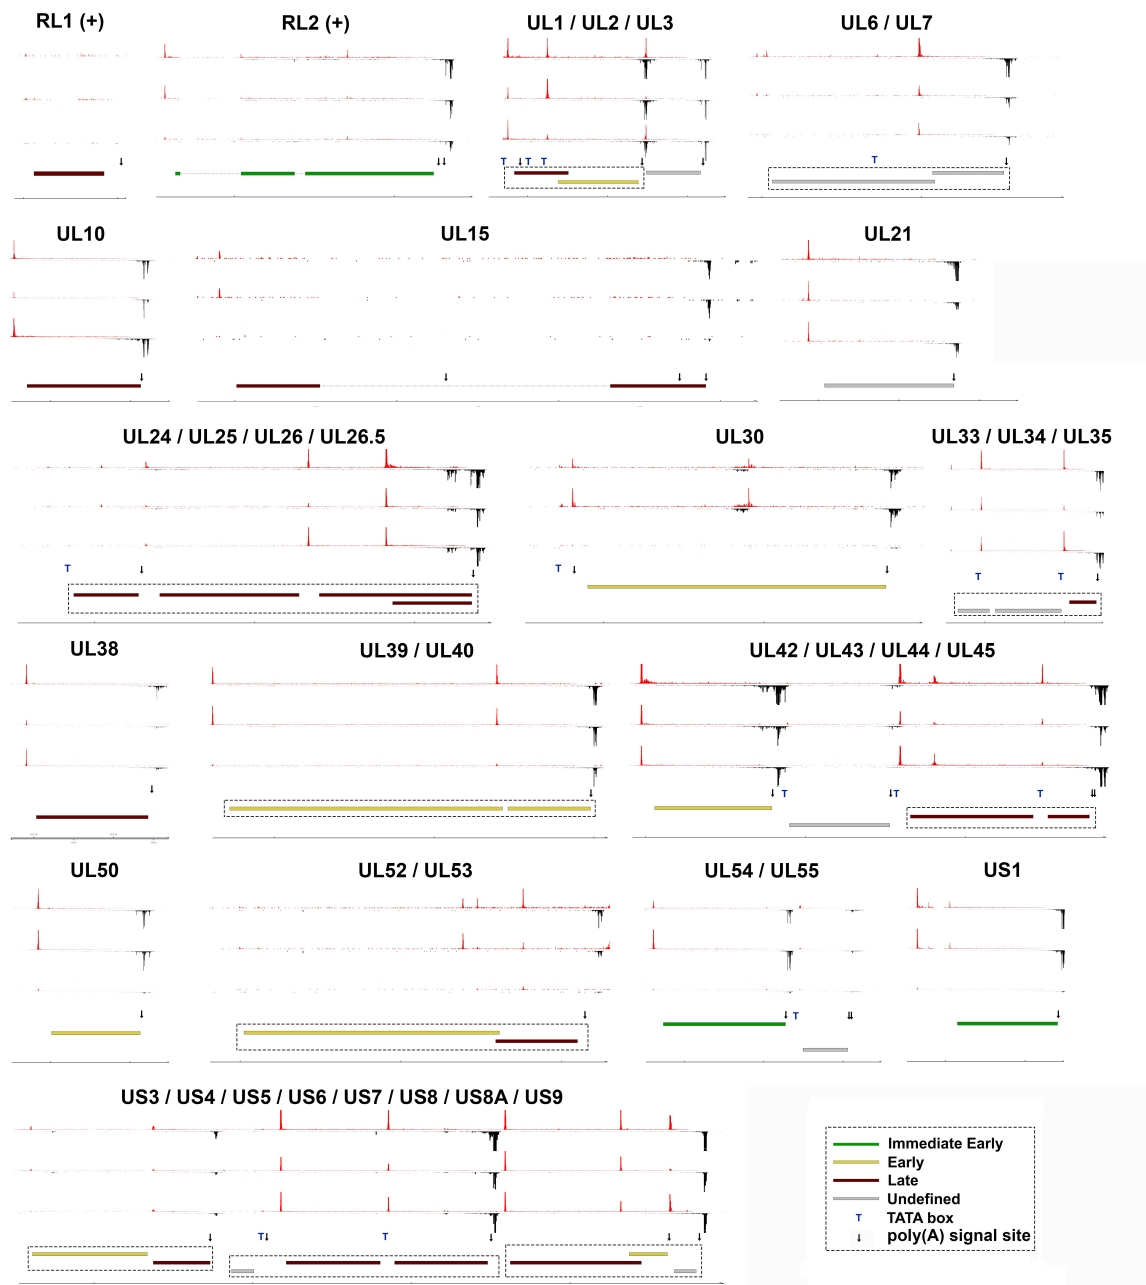

**Supplementary Fig. 6: Identification of proximal transcription initiation and cleavage/polyadenylation sites along the top strand of the HSV-1 genome.** Data sets correspond to NHDF infected with HSV-1 strain Patton for 6 hpi (upper track), strain F dVHS for 6 hpi (middle track) or strain Patton for 18 hpi (lower track). Transcripts are initiated a few nucleotides from the extreme 5' end of each nanopore read (red peaks) and polyadenylation (black peaks) occurs downstream of canonical (AAUAAA) PAS sequences. Canonical HSV-1 ORFs are colored according to kinetic class (IE – green, E – yellow, L – red, undefined – grey) while polycistronic transcriptional units are indicated by hatched boxes. Identifiable TATA boxes are indicated by an inverted blue T. Transcription proceeds from left to right. Note only the regions encompassing canonical ORFs are shown.

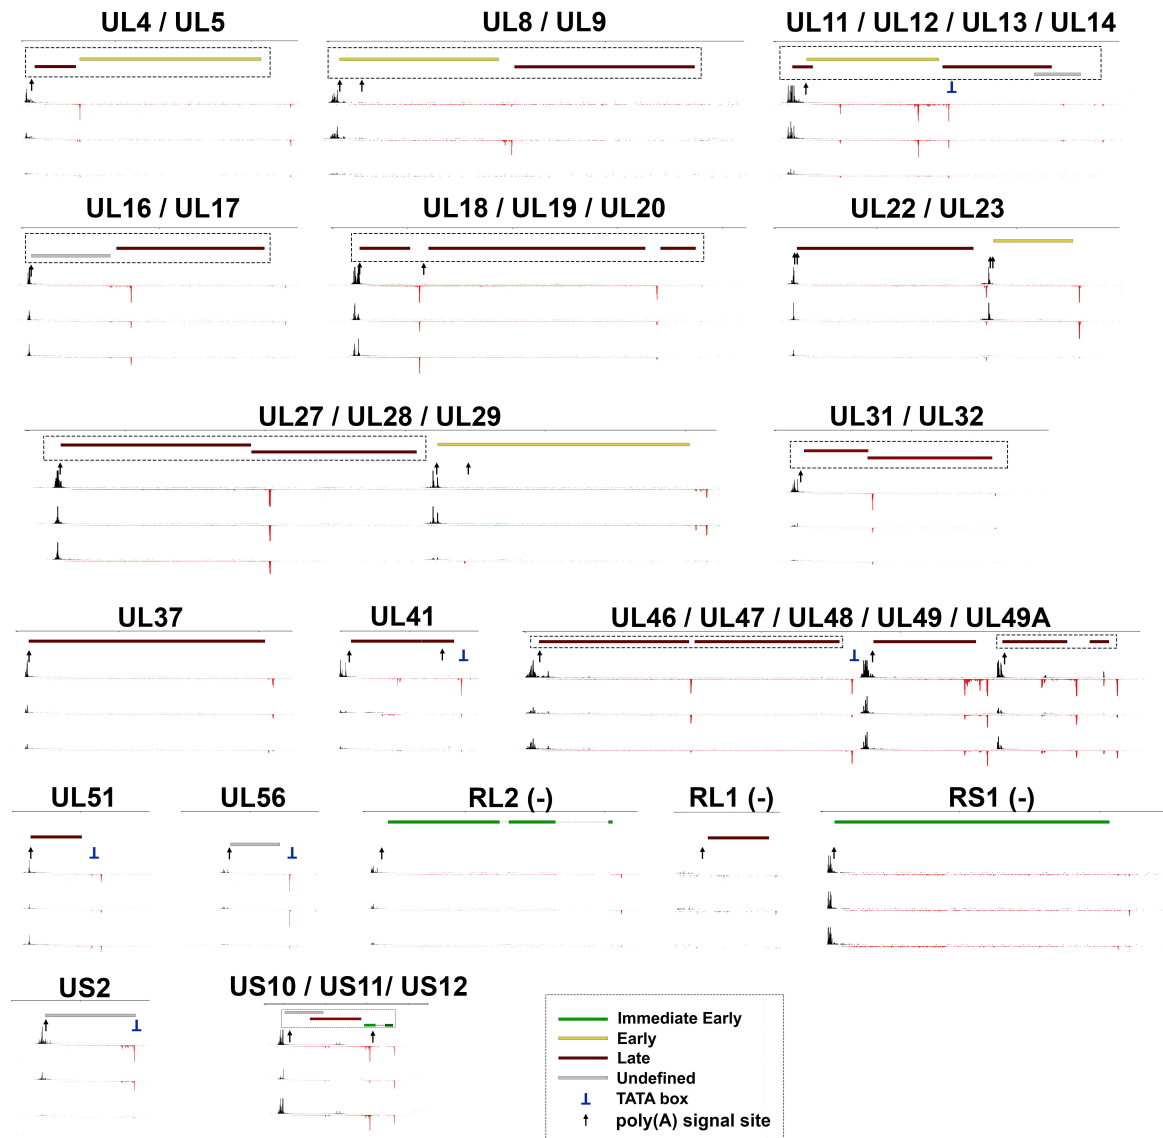

**Supplementary Fig. 7: Identification of proximal transcription initiation and cleavage/polyadenylation sites along the bottom strand of the HSV-1 genome.** Data sets correspond to NHDF infected with HSV-1 strain Patton for 6 hpi (upper track), strain F dVHS for 6 hpi (middle track) or strain Patton for 18 hpi (lower track). Transcripts are initiated a few nucleotides from the extreme 5' end of each nanopore read (red peaks) and polyadenylation (black peaks) occurs downstream of canonical (AAUAAA) PAS sequences. Canonical HSV-1 ORFs are colored according to kinetic class (IE – green, E – yellow, L – red, undefined – grey) while polycistronic transcriptional units are indicated by hatched boxes. Identifiable TATA boxes are indicated by an inverted blue T. Transcription proceeds from right to left. Note only the regions encompassing canonical ORFs are shown.

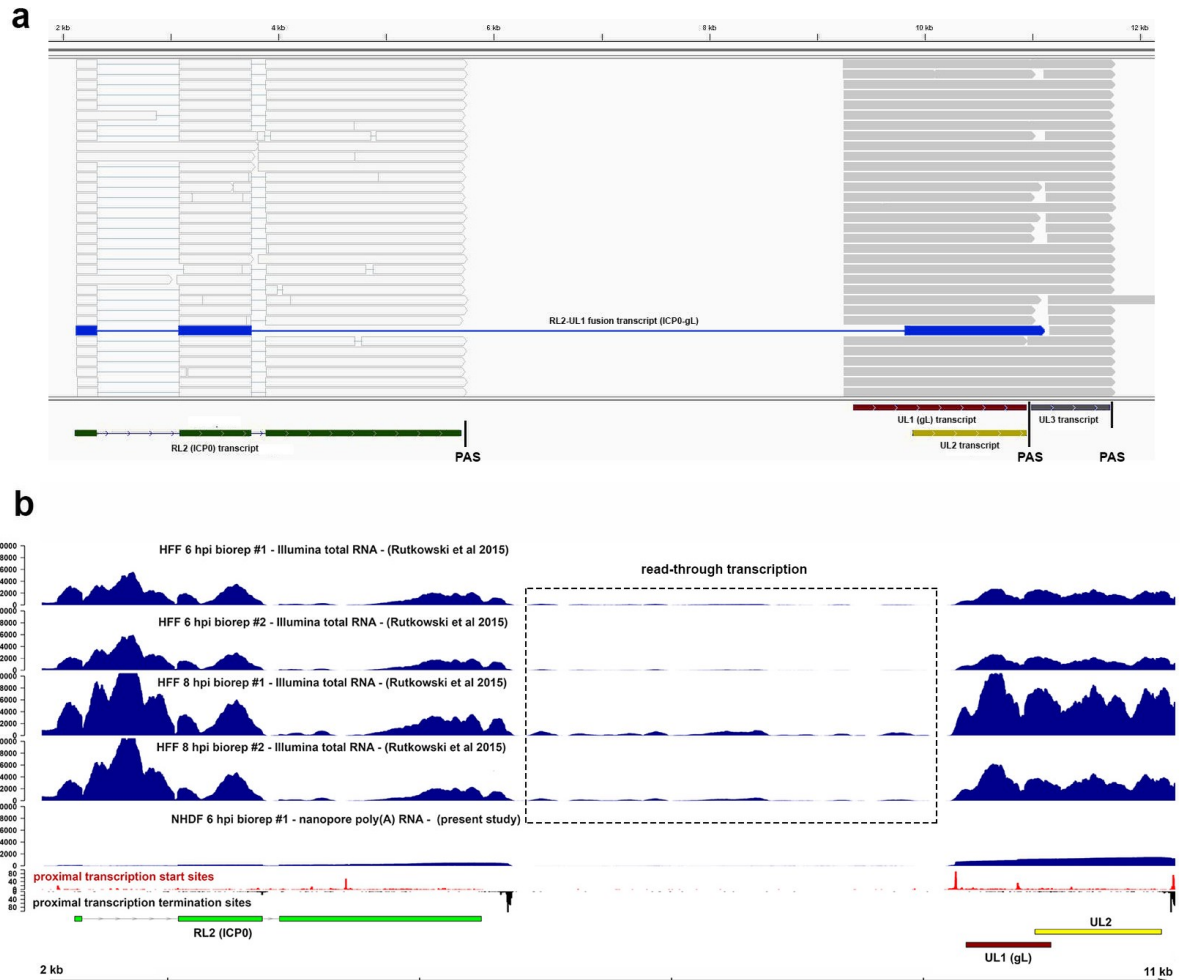

**Supplementary Fig. 8: IGV screenshots illustrating read-through transcription across the RL2-UL1 locus.** **a**, Integrative Genomics Viewer (IGV) close up of the 5' end of the unique long region of the HSV-1 genome orientated so that transcription is from left to right. Canonical transcripts are labelled and colored according to kinetic class (IE - green, E - yellow, L - red, undefined - grey). Nanopore sequence reads are shown as either white (multi-mapping –two copies of RL2 are present in the genome) or grey (uniquely-mapping). An example of the RL2-UL1 fusion transcript that encodes ICP0-gL is highlighted in blue. **b**, Illumina datasets (top four tracks) derived from sequencing of ribosomal RNA-depleted total RNA were downloaded from the Rutkowski et al 2015 study and reanalyzed to demonstrate the presence of low-level read-through transcription across the RL2-UL1 locus. Direct RNA sequencing generated from this study is also included (track 5) as are the proximal transcription start sites and transcription termination sites (RNA cleavage sites). The genomic region showing evidence of read-through transcription is indicated by the hatched box.

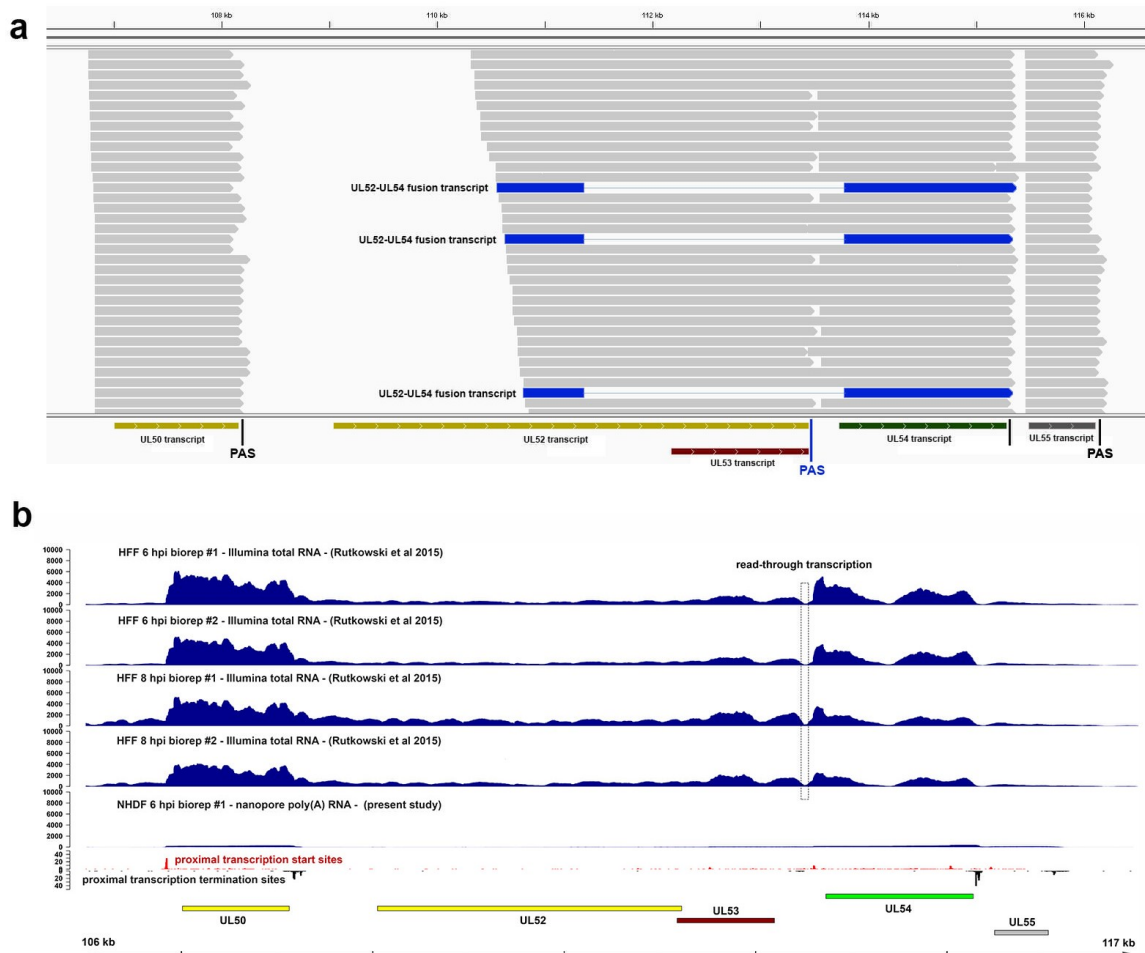

**Supplementary Fig. 9: IGV screenshots illustrating read-through transcription across the UL52-UL54 locus. a**, Integrative Genomics Viewer (IGV) close up of the 3' end of the unique long region. Transcripts are labelled and orientated as in (a). Note that polyadenylated RNAs are read 3'->5', and as such the 5' mapping of sequence reads may be influenced by RNA decay. Transcripts giving rise to the putative UL52-UL54 fusion are highlighted in blue. Canonical PAS sites (AAUAAA) are shown as vertical black bars while the non-canonical PAS sites (AUUAAA) is shown as a vertical blue bar. **b**, Illumina datasets (top four tracks) derived from sequencing of ribosomal RNA-depleted total RNA were downloaded from the Rutkowski et al 2015 study and reanalyzed to demonstrate the presence of low-level read-through transcription across the UL52-UL54 locus. Direct RNA sequencing generated from this study is also included (track 5) as are the proximal transcription start sites and transcription termination sites (RNA cleavage sites). The genomic region showing evidence of read-through transcription is indicated by the hatched box.

| Run name         | device                | Run type            | Total input RNA ( $\mu$ g) | Total Reads | Pass reads | Fail reads | CS reads |
|------------------|-----------------------|---------------------|----------------------------|-------------|------------|------------|----------|
| NDHF 6hpi        | MinION Mk Ib [Unit B] | Direct RNA (minION) | 25                         | 519,417     | 373,625    | 124,826    | 20,966   |
| NDHF 6hpi [dVHS] | MinION Mk Ib [Unit B] |                     | 21.2                       | 422,274     | 300,516    | 114,080    | 7,678    |
| NHDF 18hpi (i)   | MinION Mk Ib [Unit A] |                     | 25                         | 377,163     | 218,903    | 114,374    | 43,886   |
| NHDF 18hpi (ii)  | MinION Mk Ib [Unit A] |                     | 25                         | 217,022     | 112,700    | 90,912     | 13,410   |
| NHDF 18hpi (iii) | MinION Mk Ib [Unit B] |                     | 25                         | 297,866     | 169,515    | 64,299     | 64,052   |
| NHDF 18hpi (iii) | Illumina HiSeq 4000   | Illumina mRNA-Seq   | 2                          | 24,929,213  | n/a        | n/a        | n/a      |

all native RNA sequencing runs were performed for 18 hours

CS – RNA calibration strand reads

n.a. – not applicable

### Supplementary Table 1: Sequencing metrics

| Transcription unit<br>(first encoded ORF) | 5' transcript end<br>peak* (proximal<br>transcript start) | Coding<br>strand | nearest<br>TATAAA box<br>(upstream) | Distance to<br>upstream<br>TATA box (nt) | Distance to<br>ATG in first<br>encoded ORF |
|-------------------------------------------|-----------------------------------------------------------|------------------|-------------------------------------|------------------------------------------|--------------------------------------------|
| RL1 (+)                                   | 425                                                       | +                | n/a                                 | n/a                                      | n/a                                        |
| RL2 (+)                                   | 2129                                                      | +                | n/a                                 | n/a                                      | 133                                        |
| UL1 / UL2                                 | 9257                                                      | +                | 9217                                | -40                                      | 81                                         |
| UL2                                       | 9749                                                      | +                | 9713                                | -36                                      | 136                                        |
| UL3                                       | 10984                                                     | +                | n/a                                 | n/a                                      | 7                                          |
| UL6 / UL7                                 | 15058                                                     | +                | n/a                                 | n/a                                      | 73                                         |
| UL7                                       | 16963                                                     | +                | n/a                                 | n/a                                      | 173                                        |
| UL10                                      | 23041                                                     | +                | n/a                                 | n/a                                      | 164                                        |
| UL15                                      | 28812                                                     | +                | n/a                                 | n/a                                      | 209                                        |
| UL21                                      | 41872                                                     | +                | n/a                                 | n/a                                      | 203                                        |
| UL24 / UL25 / UL26 /<br>UL26.5            | 47418                                                     | +                | n/a                                 | n/a                                      | 320                                        |
| UL25 / UL26 /<br>UL26.5                   | 48641                                                     | +                | n/a                                 | n/a                                      | 173                                        |
| UL26 / UL26.5                             | 50675                                                     | +                | n/a                                 | n/a                                      | 135                                        |
| UL26.5                                    | 51646                                                     | +                | n/a                                 | n/a                                      | 82                                         |
| UL30                                      | 62618                                                     | +                | n/a                                 | n/a                                      | 189                                        |
| UL33 / UL34 / UL35                        | 69075                                                     | +                | n/a                                 | n/a                                      | 86                                         |
| UL34 / UL35                               | 69453                                                     | +                | 69412                               | -41                                      | 180                                        |
| UL35                                      | 70497                                                     | +                | 70456                               | -41                                      | 69                                         |
| UL38                                      | 84404                                                     | +                | n/a                                 | n/a                                      | 127                                        |
| UL39                                      | 86227                                                     | +                | n/a                                 | n/a                                      | 206                                        |
| UL40                                      | 89786                                                     | +                | n/a                                 | n/a                                      | 139                                        |
| UL42                                      | 92945                                                     | +                | n/a                                 | n/a                                      | 167                                        |
| UL43                                      | 94744                                                     | +                | n/a                                 | n/a                                      | 55                                         |
| UL44 / UL45                               | 96171                                                     | +                | 96141                               | -30                                      | 141                                        |
| UL45                                      | 97963                                                     | +                | n/a                                 | n/a                                      | 70                                         |
| UL50                                      | 106844                                                    | +                | n/a                                 | n/a                                      | 167                                        |
| UL52 / UL53                               | n.d.                                                      | +                | n/a                                 | n/a                                      | n/a                                        |

|                              |        |   |        |     |     |
|------------------------------|--------|---|--------|-----|-----|
| UL53                         | 111953 | + | n/a    | n/a | 227 |
| UL54                         | 113613 | + | n/a    | n/a | 122 |
| UL55                         | 115458 | + | 115416 | -42 | 39  |
| LAT (+)                      | n.d.   | + | n/a    | n/a | n/a |
| US1                          | 132142 | + | n/a    | n/a | 505 |
| US3 / US4                    | 135204 | + | n/a    | n/a | 21  |
| US4                          | 136754 | + | n/a    | n/a | -7  |
| US5 / US6 / US7              | 137638 | + | n/a    | n/a | 96  |
| US6 / US7                    | 138358 | + | n/a    | n/a | 65  |
| US7                          | 139712 | + | 139677 | -35 | 77  |
| US8 / US8A / US9             | 141183 | + | n/a    | n/a | 64  |
| US8A / US9                   | 142641 | + | n/a    | n/a | 107 |
| US9                          | 143260 | + | n/a    | n/a | 57  |
| RS1 (+)                      | 146938 | + | n/a    | n/a | 128 |
| LAT (-)                      | n.d.   | - | n/a    | n/a | n/a |
| UL5 / UL4                    | 12488  | - | n/a    | n/a | 65  |
| UL5                          | 15572  | - | n/a    | n/a | 440 |
| UL9 / UL8                    | 20666  | - | n/a    | n/a | 95  |
| UL9                          | n.d.   | - | n/a    | n/a | n/a |
| UL11                         | 25488  | - | n/a    | n/a | 396 |
| UL12 / UL11                  | 27035  | - | 27076  | -41 | 147 |
| UL13 / UL12 / UL11           | 28676  | - | n/a    | n/a | 173 |
| UL14 / UL13 / UL12 /<br>UL11 | 29236  | - | n/a    | n/a | 320 |
| UL16 / UL17                  | 31597  | - | n/a    | n/a | 301 |
| UL17                         | 33802  | - | n/a    | n/a | 304 |
| UL18 / UL19 / UL20           | 36239  | - | n/a    | n/a | 187 |
| UL19 / UL20                  | 40756  | - | n/a    | n/a | 227 |
| UL20                         | 41603  | - | n/a    | n/a | 114 |
| UL22                         | 46570  | - | n/a    | n/a | 187 |



|                    |        |   |        |     |     |
|--------------------|--------|---|--------|-----|-----|
| UL23               | 47897  | - | n/a    | n/a | 94  |
| UL28 / UL27        | 56070  | - | n/a    | n/a | 275 |
| UL28               | 58848  | - | n/a    | n/a | 688 |
| UL29               | 62220  | - | n/a    | n/a | 249 |
| UL32 / UL31        | 67448  | - | n/a    | n/a | 69  |
| UL32               | 69208  | - | n/a    | n/a | 16  |
| UL36               | n.d.   | - | n/a    | n/a | n/a |
| UL37               | 84136  | - | n/a    | n/a | 52  |
| UL41               | 92743  | - | 92785  | -42 | 107 |
| UL47 / UL46        | 100982 | - | n/a    | n/a | 29  |
| UL47               | 103300 | - | 103341 | -41 | 183 |
| UL48               | 105247 | - | n/a    | n/a | 167 |
| UL49A / UL49       | 106528 | - | n/a    | n/a | 136 |
| UL49A              | 107117 | - | n/a    | n/a | 123 |
| UL51               | 109157 | - | 109196 | -39 | 145 |
| UL56               | 117068 | - | 117116 | -48 | 142 |
| RL2 (-)            | 124246 | - | n/a    | n/a | 134 |
| RL1 (-)            | n.d.   | - | n/a    | n/a | n/a |
| RS1 (-)            | n.d.   | - | n/a    | n/a | n/a |
| US2                | 135293 | - | 135336 | -43 | 362 |
| US12 / US11 / US10 | 145160 | - | n/a    | n/a | 60  |
| US12 / US11        | 145452 | - | n/a    | n/a | 201 |
| US12               | 146054 | - | n/a    | n/a | 472 |

**Supplementary Table 2: pTSS for canonical HSV-1 ORFs**

| Transcription unit (first encoded ORF) | 5' transcript end peak* (proximal transcript start) | Coding strand | nearest TATAAA box (upstream) | Distance to upstream TATA box (nt) | Distance to ATG in first encoded ORF | Note         |
|----------------------------------------|-----------------------------------------------------|---------------|-------------------------------|------------------------------------|--------------------------------------|--------------|
| UL6 / UL7                              | 14938                                               | +             | n/a                           | n/a                                | 193                                  |              |
|                                        | 15026                                               | +             | n/a                           | n/a                                | 105                                  |              |
|                                        | 15058                                               | +             | n/a                           | n/a                                | 73                                   | largest peak |
| UL24 / UL25 / UL26 / UL26.5            | 47418                                               | +             | n/a                           | n/a                                | 320                                  | largest peak |
|                                        | 47681                                               | +             | n/a                           | n/a                                | 57                                   |              |
| UL53                                   | 111771                                              | +             | n/a                           | n/a                                | 409                                  |              |
|                                        | 111953                                              | +             | n/a                           | n/a                                | 227                                  | largest peak |
| US1                                    | 132142                                              | +             | n/a                           | n/a                                | 505                                  | largest peak |
|                                        | 132542                                              | +             | n/a                           | n/a                                | 105                                  |              |
| UL9 / UL8                              | 20572                                               | -             | n/a                           | n/a                                | 95                                   | largest peak |
|                                        | 20666                                               | -             | n/a                           | n/a                                | 189                                  |              |
| UL14 / UL13 / UL12 / UL11              | 29236                                               | -             | n/a                           | n/a                                | 320                                  | largest peak |
|                                        | 29115                                               | -             | n/a                           | n/a                                | 199                                  |              |
| UL29                                   | 62303                                               | -             | n/a                           | n/a                                | 249                                  |              |
|                                        | 62220                                               | -             | n/a                           | n/a                                | 166                                  | largest peak |
|                                        | 62151                                               | -             | n/a                           | n/a                                | 97                                   |              |
| UL51                                   | 109157                                              | -             | 109196                        | -39                                | 145                                  |              |
|                                        | 109293                                              | -             | n/a                           | n/a                                | 181                                  | largest peak |

**Supplementary Table 3: ORFs with multiple pTSS**

| 5' transcript end peak* [proximal transcript start] | Transcription unit    | Coding strand | Description                                                       |
|-----------------------------------------------------|-----------------------|---------------|-------------------------------------------------------------------|
| 15860                                               | UL6/UL7               | +             | internal to UL6 ORF                                               |
| 48087                                               | UL24/UL25/UL26/UL26.5 | +             | internal to UL24 ORF                                              |
| 64808                                               | UL30                  | +             | internal to UL30 ORF                                              |
| 96607                                               | UL44/UL45             | +             | internal to UL44 ORF   Previously described by Tombácz et al 2017 |
| 111953                                              | UL52/UL53             | +             | internal to UL53 ORF                                              |
| 115408                                              | UL55                  | +             | internal to UL55 ORF   Previously described by Tombácz et al 2017 |
| 26748                                               | UL11/UL12/UL13/UL14   | -             | internal to UL12 ORF   Previously described by Tombácz et al 2017 |
| 91834                                               | UL41                  | -             | internal to UL41 ORF   Previously described by Tombácz et al 2017 |

**Supplementary Table 4: Novel pTSS**

| Fusion      | exons | Exon 1 start | Exon 1 end        | Exon 2 start    | Exon 2 end        | Exon 3 start    | Exon 3 end |
|-------------|-------|--------------|-------------------|-----------------|-------------------|-----------------|------------|
| RL2 - UL1   | 3     | 2261         | 2318              | 3083            | 3750              | 9821            | 10012      |
|             |       |              | <i>GAG GTGAGG</i> | <i>TTAG C</i>   | <i>ACG GTGAGG</i> | <i>GTAG G</i>   |            |
|             |       |              | fully conserved   | fully conserved | fully conserved   | fully conserved |            |
| UL52 - UL54 | 2     | 109049       | 111360            | 113787          | 115273            |                 |            |
|             |       |              | <i>CCC GTACGT</i> | <i>ACAG C</i>   |                   |                 |            |
|             |       |              | fully conserved   | fully conserved |                   |                 |            |

intron sequence in splice donor and acceptor shown in italics

all genome co-ordinates refer to HSV-1 strain 17 (NC\_001806.2)

**Supplementary Table 5: Fusion transcripts**

| Target                                   | Start  | Stop   | Sequence             |
|------------------------------------------|--------|--------|----------------------|
| RL2 exon2 – exon3 splice junction        | 3720   | 3737   | ACGGACGAGGATGACGAC   |
|                                          | 4066   | 4047   | TGGTGGTGGTGTGGTGTTA  |
| RL2 exon2 – UL1 internal splice junction | 3615   | 3634   | GCCGTGGACTTTATCTGGAC |
|                                          | 9857   | 9838   | CAGACGTTCCGTTGGTAGGT |
| UL1 internal                             | 9734   | 9751   | CTGGACAGTCGCAAGCAG   |
|                                          | 9838   | 9857   | CAGACGTTCCGTTGGTAGGT |
| UL52 internal                            | 111235 | 111254 | CGAGGTTGCCTACTTTGACC |
|                                          | 111366 | 111385 | CGTTAGAGAACCGTGGACGA |
| UL54 internal                            | 113737 | 113756 | GGCGACTGACATTGATATGC |
|                                          | 113874 | 113892 | GGGTCTCCATGTCCTCGT   |
| UL52 - UL54 internal splice junction     | 111235 | 111254 | CGAGGTTGCCTACTTTGACC |
|                                          | 113874 | 113892 | GGGTCTCCATGTCCTCGT   |
| 18s rRNA                                 | Chr 21 |        | AGGAATTGACGGAAGGGCAC |
|                                          | Chr 21 |        | TTATCGGAATTAACCAGACA |

Note: all genome co-ordinates refer to HSV-1 strain 17 (NC\_001806.2)

### Supplementary Table 6: Primers used in this study

## Supplementary Note 1

During the course of this study, we observed unexpected artefacts in a small number of nanopore sequence reads. These became apparent when profiling the CIGAR strings for each aligned read to identify spliced transcripts. We exemplify this here by focusing on the sequencing of the RNA CS (Enolase 2) control strand. Enolase 2 is a single exon gene that is not known to undergo splicing (<https://goo.gl/TepUW5>).

Here, we align sequence reads passing QC using MiniMap2 and determine the number of mapping reads and the number of reads containing 'N' characters in their CIGAR string. 'N' is defined as a skipped region from the reference and denotes the presence of a presumed intron.

```
#map reads
minimap2 -ax splice -k14 -uf --secondary=no ENO2_RNACS.fasta QCpass.reads.fastq >
outfile.cs.sam
#determine total reads mapped (flag 0)
cut -f2 outfile.cs.sam | sort | uniq -c
#determine number of reads with 'internal splicing'
awk '$6 ~/N/ {print $0}' outfile.cs.sam | wc -l
```

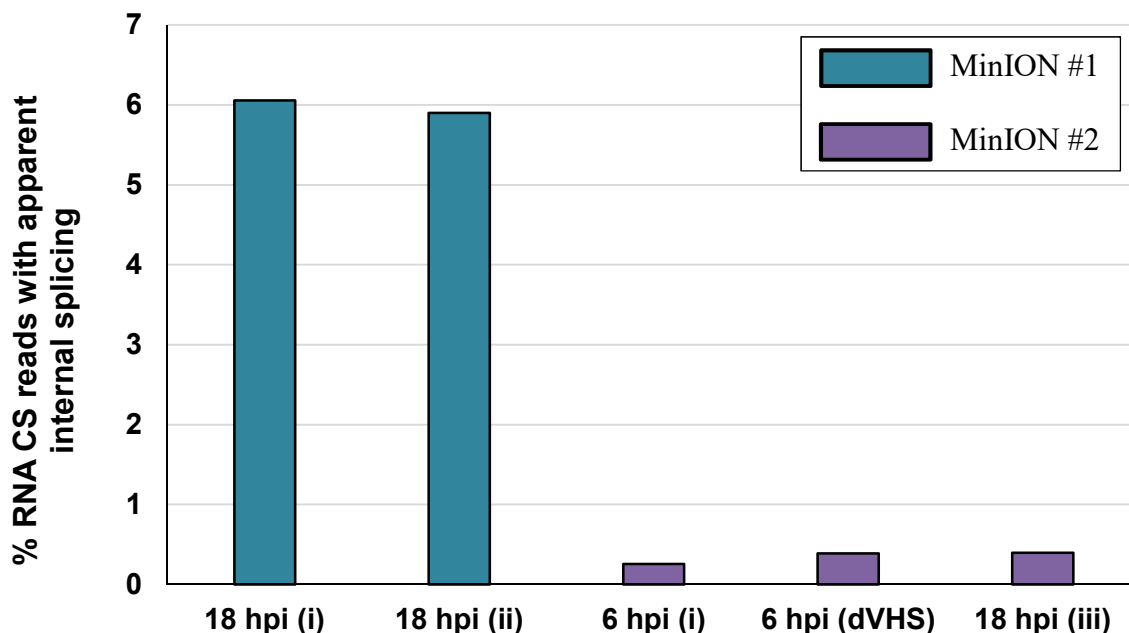

The reader will note that the % of RNA CS mapping reads is heavily influenced by the specific MinION device used (each was plugged into a different computer in a different building). We repeated basecalling using several previous version of the albacore basecaller

without any notable changes. We discussed our data with customer support at Oxford Nanopore Technologies but remain unable to discern why this occurs.

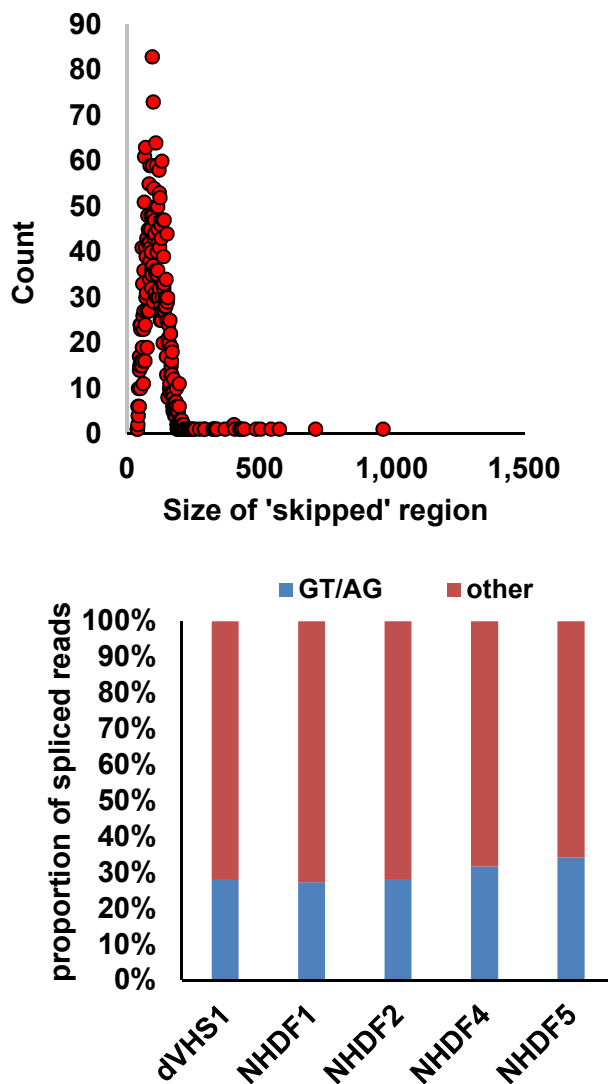

**Figure 2:** (left) The sizes of the 'intron' regions within spliced reads were determined and collated for all five datasets. The median size of the 'introns' is 95nt. (right) only 25-30% of the 'splice junctions' utilize canonical GT/AG splice donor/acceptor pairs.

The positions and sizes of the artefactual introns are inconsistent, suggesting it is not a sequence feature. Indeed, to most notable features are that (i) the intron lengths are generally < 100 nt, and (ii) multiple reads containing the same intron artefact are not seen. Splice donor/acceptor sequences tend toward canonical GT/AG pairs but this is likely a manifestation of MiniMap2 attempting to align in a splice-aware manner.

From the point of view of our studies, the impact was minimal as we were generally able to distinguish artefactual introns from real introns by examining splice site usage and, most critically, requiring that identical introns are identified in multiple distinct sequence

reads. Finally, of course, experimental validation was used to confirm the novel splice junctions we discovered.

## Supplementary Note 2:

### Examples of code used during data processing and analysis

#### Introduction

-- The aim of this document is to provide guidance on how to perform the same analyses as those presented in this manuscript. We can offer no guarantees as to how translatable these approaches are to other studies but hope that the following will be of use to those interested in replicating or performing similar studies. Readers should also note that much of the simple data processing was performed using simple command line tools (i.e. awk and sed) while other steps were processed manually using spreadsheet software. A full list of softwares required to run these analyses are detailed at the end of this document. Please note that we are not responsible for these softwares and as many are continually updated, certain commands or functions may change or become redundant. Please remember that questions about errors when installing/using softwares listed here should be directed at the authors of the software and not the authors of this manuscript. Specific questions regarding any of the below may be directed to the corresponding authors listed in the manuscript.

#### Error-correction

-- Our error-correction approach requires a compatible Illumina dataset, ideally generated from the same source material. Importantly, error-correction works best with longer Illumina paired-end reads (e.g. 2 x 100) that are merged using FLASH. However, simply extending the number of sequencing cycles used is insufficient as fragment lengths should also be increased. Most Illumina poly(A) selection protocols perform a fragmentation step at 96-98°C for 8-10 mins. By reducing temperature (e.g. 92°C) and time (e.g. 6 mins), the median size of RNA fragments can be pushed toward 250 – 300 nt). Following FLASH merging of the Illumina dataset, nanopore reads are separated into groups (Chunks) and corrected using Illumina data.

#1: Generate FLASH merged Illumina dataset

```
FLASH --min-overlap=10 --max-overlap=150 illumina_1.fq illumina_2.fq
```

#2: Convert raw nanopore sequence reads (fastq) to fasta form with T replacing U

```
fastq2fasta -i raw.fastq -o raw.fasta
```

```
sed 's/U/T/g' raw.fasta > raw_U2T.fasta
```

#3: Use SeqChunker (proovread package) to chunk reads\* and run proovread\*\* using subsampled Illumina reads to perform error-correction

```
/proovread/bin/SeqChunker -s 4M -o SeqChunk.%.03d.fa raw_U2T.fasta
```

```
/proovread/bin/proovread -l SeqChunk.001.fa -s extendedFragments.fastq -s notCombined_1.fastq -s notCombined_2.fastq --pre proovread-001 --overwrite --no-sampling
```

\*chunking sizes can be adjusted (e.g 8M, 16M) if the number of individual SeqChunks becomes too high to manage

-- The proovread step should be run for every SeqChunk generated and for every subsampled Illumina dataset. This is very intensive and should be parallelised as much as possible using an HPC cluster.

-- The final output from each proovread run should be a directory containing a file ending in \*untrimmed.fq. The untrimmed.fq files generated from each SeqChunk should be concatenated into a single fastq file that subsequently contains all error-corrected reads resulting from a specific subsampled Illumina dataset. These can then be mapped against the genome of choice and processed to extract CIGAR string lengths

### **Determining the overall lengths of HSV-1 mapping pseudotranscripts**

#1: align raw and error-corrected fastq datasets to the HSV-1 reference genome

```
minimap2 -ax splice -k14 -uf --secondary=no refgenome.fasta reads.fq > reads.outfile.sam
```

#2: filter for primary mapping reads only (flags 0 & 16) and use egrep and AWK to determine overall read length of each individual sequence read and print to stdout

```
egrep HSV1-st17 reads.outfile.sam | grep -v 2048 | grep -v 2064 | cut -f10 | awk '{ print length($0); }'
```

---For visualization options, see section 'Visualization using Rstudio'

### **Determining the aligned lengths of HSV-1 mapping pseudotranscripts**

#1: align raw and error-corrected fastq datasets to the HSV-1 reference genome

```
minimap2 -ax splice -k14 -uf --secondary=no refgenome.fasta reads.fq > reads.outfile.sam
```

#2: use bamutils (ngsutils) to trim soft-clipped sequence reads (i.e. remove the soft-clipped part of the sequence)

```
samtools view -o reads.outfile.bam reads.outfile.sam
```

```
bamutils removeclipping reads.outfile.bam reads.outfile.clipped.bam
```

```
samtools view reads.outfile.clipped.bam > reads.outfile.clipped.sam
```

#3: filter for primary mapping reads only (flags 0 & 16) and use egrep and AWK to determine overall read length of each individual sequence read and print to stdout

```
egrep HSV1-st17 reads.outfile.clipped.sam | grep -v 2048 | grep -v 2064 | cut -f10 | awk '{ print length($0); }'
```

---For visualization options, see section 'Visualization using Rstudio'

### **Determine proportion of reads encoding ORFs > 90 nt**

#1: align pseudotranscripts to HSV-1, convert pseudotranscripts from fastq to fasta

```
minimap2 -ax splice -k14 -uf --secondary=no refgenome.fasta pseudotranscripts.fq > outfile.sam  
fastq2fasta -i pseudotranscripts.fq -o pseudotranscripts.fasta
```

#2: extract mapping read IDs and deduplicate, then use BBtools (filterbyname.sh) and ORF identification script (<https://goo.gl/bgbMEs>)

#top strand

```
cut -f1,2 outfile.sam | grep -w 0 | cut -f1 | sort | uniq > ids.list
```

```
filterbyname.sh in= pseudotranscripts.fasta out=pseudo.mapped.fasta names=ids.list include=t
```



```
python ~/scripts/get_orfs_or_cdss.py -i pseudo.mapped.fasta -f fasta -t CDS -e closed -m one -
s forward --min_len=90 --on longestORFs.forward.fasta
#bottom strand
cut -f1,2 outfile.sam | grep -w 16 | cut -f1 | sort | uniq > ids.list
filterbyname.sh in= pseudotranscripts.fasta out= pseudo.mapped.fasta names=ids.list include=t
overwrite=true
python ~/scripts/get_orfs_or_cdss.py -i pseudo.mapped.fasta -f fasta -t CDS -e closed -m one -
s reverse --min_len=90 --on reverse.longestORFs.fasta
#3: determine number of ORFs present
cat longestORFs.forward.fasta reverse.longestORFs.fasta > longestORFs.fasta
grep -c \> longestORFs.fasta
```

## **Mapping 5' pTSS and 3' pTTS sites**

#1: Map reads to HSV-1 genome and parse to sorted BAM file (requires SAMtools and BEDtools)

```
minimap2 -ax splice -k14 -uf --secondary=no refgenome.fasta reads.fq > reads.outfile.sam
samtools view -b -F4 -o reads.outfile.bam reads.outfile.sam
samtools sort -o reads.outfile.sorted.bam reads.outfile.bam
samtools index reads.outfile.sorted.bam
bamToBed -bed12 -i reads.outfile.sorted.bam > reads.outfile.sorted.bed
```

#2: extract 5' (pTSS) and 3' (pTTS) mapping co-ordinates

```
awk '$6 ~ /^[+$/ {print $0}' reads.outfile.sorted.bed | cut -f2 | sort -n | uniq -c | sed 's/^
*/' | sed 's/ /\t/g' | awk '{print "HSV1-st17",$2,$2,$1}' > forward.pTSS.txt
awk '$6 ~ /^-$/ {print $0}' reads.outfile.sorted.bed | cut -f3 | sort -n | uniq -c | sed 's/^
*/' | sed 's/ /\t/g' | awk '{print "HSV1-st17",$2,$2,$1}' > reverse.pTSS.txt
awk '$6 ~ /^[+$/ {print $0}' reads.outfile.sorted.bed | cut -f3 | sort -n | uniq -c | sed 's/^
*/' | sed 's/ /\t/g' | awk '{print "HSV1-st17",$2,$2,$1}' > forward.pTTS.txt
awk '$6 ~ /^-$/ {print $0}' reads.outfile.sorted.bed | cut -f2 | sort -n | uniq -c | sed 's/^
*/' | sed 's/ /\t/g' | awk '{print "HSV1-st17",$2,$2,$1}' > reverse.pTTS.txt
---For visualization options, see section 'Visualization using Rstudio'
```

## **Identification of putative transcript fusions**

-- Fusion transcripts are challenging to identify, particular for a virus such as HSV-1 where many genes are arranged in polycistronic units and resulting transcripts may encode multiple ORFs. For instance, in a polycistronic gene array arranged 1-2-3, all transcripts containing -1- will also contain -2- and -3- as all three genes will share the same poly(A) signal site. Thus, simply aligning reads against and HSV-1 transcriptome database is not sufficient to detect true chimeras.

#1: First map the nanopore reads against a transcriptome database and extract reads that map to multiple ORFs.

```
minimap2 -ax splice -k14 -uf --secondary=no HSV1-st17.transcripts.fasta
nanopore.fastq > aligned.sam
awk '$2==2048 {print $1}' aligned.sam | sort | uniq > chimeric.reads.list
```

#2: Generate a fasta file containing only full length chimeric pseudotranscripts

```
filterbyname.sh in=nanopore.fastq out=chimeric.reads.fasta names=chimeric.reads.list include=t
overwrite=TRUE
```

#3: Identify all ORFs greater than 150 amino acids

```

ORFfinder -in chimeric.reads.fasta -outfmt 1 -ml 150 -n true -s 0 -strand plus
> chimeric.reads.orfs.fasta
# fix fasta file so each sequence is on one line only
awk '!/^>/ { printf "%s", $0; n = "\n" } /^>/ { print n $0; n = "" }END { printf "%s", n
}' chimeric.reads.orfs.fasta > chimeric.reads.orfs.fixed.fasta

# Identify only full coding frames
awk 'NR%2{printf "%s ",$0;next;}1' chimeric.reads.orfs.fixed.fasta | grep "TAA$" > TAA.txt
awk 'NR%2{printf "%s ",$0;next;}1' chimeric.reads.orfs.fixed.fasta | grep "TGA$" > TGA.txt
awk 'NR%2{printf "%s ",$0;next;}1' chimeric.reads.orfs.fixed.fasta | grep "TAG$" > TAG.txt
# Merge and output
cat TAA.txt TGA.txt TAG.txt | awk '{print $1,$2"\n"$3}' > complete.orfs.fasta
#4: Map predicted ORFs against the HSV-1 transcriptome and export IDs of all those
mapping to multiple transcripts.
minimap2 -ax splice -k14 -uf --secondary=no HSV1-st17.transcripts.fasta complete.orfs.fasta >
aligned.sam
awk '$2==2048 {print $1}' aligned.sam > temp1.list
awk '$2==4 {print $1}' aligned.sam > temp2.list
cat temp1.list temp2.list | sort | uniq > temp.list
#5: Extract predicted ORF sequences with matching IDs, then map to the HSV-1 genome
and print out all mappings with intronic regions. These represent a list of
putative transcript fusions that can be taken forward for closer examination
filterbyname.sh in= complete.orfs.fasta out=candidates.fasta names=temp.list include=t
overwrite=TRUE
minimap2 -ax splice -k14 -uf --secondary=no / HSV1-
st17.genome.fasta candidates.fasta > fusions.sam
awk '$6 ~ /N/ {print $0}' fusions.sam
-- The final list should not be considered a gold standard by any means. At this
stage we recommend visualising the original mapping of nanopore sequence reads to
the genome to find and examine the splice sites used (Do they use canonical
donors/acceptors? Are they supported by multiple reads?). subsequent experimental
confirmation is, of course, absolutely essential.

```

## **Visualization using Rstudio**

-- Most of the images in this manuscript are generated using Rstudio. Genome plots invariably make use of Gviz in concert with GenomicFeatures while scatter (violin) plots are made using ggplot2. Boundless examples of how to use these tools can be found all over the internet with specific pertinent examples available via the links below.

Genome visualizations

<https://davetang.org/muse/2013/10/03/using-gviz/>

Scatter (violin) plots

<http://www.sthda.com/english/wiki/ggplot2-violin-plot-quick-start-guide-r-software-and-data-visualization>

## **List of packages required for the example analyses**

FLASh - <https://ccb.jhu.edu/software/FLASH/>

proovread - <https://github.com/BioInf-Wuerzburg/proovread>  
bbtools - <https://jgi.doe.gov/data-and-tools/bbtools/>  
SAMtools - <http://samtools.sourceforge.net/>  
BEDtools - <https://bedtools.readthedocs.io/en/latest/>  
ngsutils - <https://github.com/ngsutils/ngsutils>  
Gviz - <https://bioconductor.org/packages/release/bioc/html/Gviz.html>  
GenomicFeatures -  
<https://bioconductor.org/packages/release/bioc/html/GenomicFeatures.html>  
ggplot2 - <https://ggplot2.tidyverse.org/>
